# Supplementary material for: Comparison between electrochemiluminescence of luminol and electrocatalysis by Prussian blue for the detection of hydrogen peroxide
Source: Royal Society of Chemistry journal article supplement (doi:10.1039/d4ay02175d), 2025-01-01
Supplement: d4ay02175d1.pdf [file d4ay02175d1.pdf]

## Supplementary Information

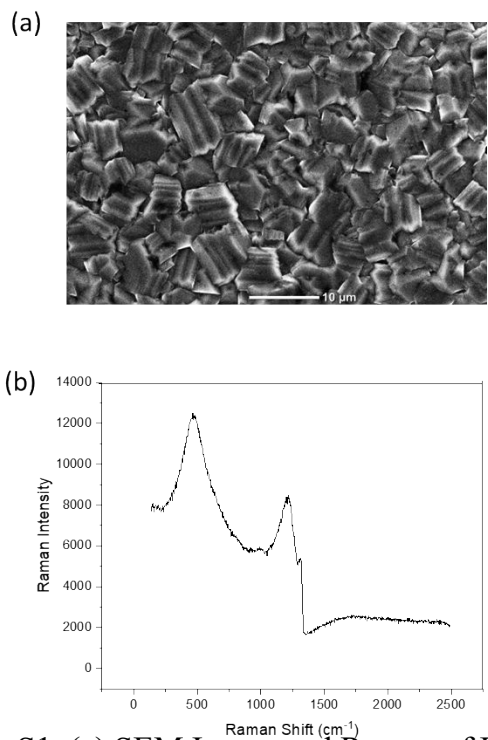

S1. (a) SEM Image and Raman of BDD

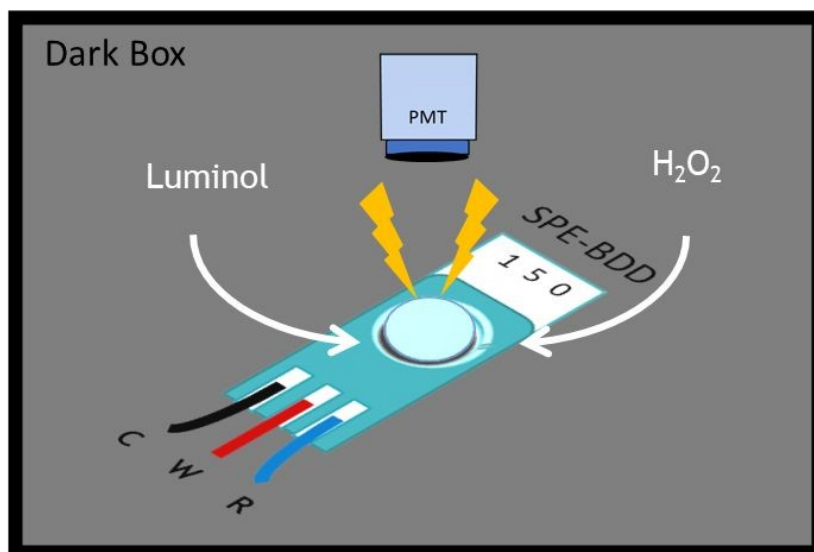

S2. Schematic boron-doped diamond screen-printed electrode for the electrochemiluminescence measurements

|                                                    |                          |                         |
|----------------------------------------------------|--------------------------|-------------------------|
| Concentration of H <sub>2</sub> O <sub>2</sub> for | Current Response without | Current Response in the |
|----------------------------------------------------|--------------------------|-------------------------|

| each Pb-BDD | adding H <sub>2</sub> O <sub>2</sub> (blank) (μA) | presence of H <sub>2</sub> O <sub>2</sub> (μA) |
|-------------|---------------------------------------------------|------------------------------------------------|
| 0           | -0.23661                                          | -0.23                                          |
| 1           | -0.22049                                          | -1.66                                          |
| 3           | -0.22257                                          | -5.39                                          |
| 5           | -0.21288                                          | -6.55                                          |
| 10          | -0.21613                                          | -7.87                                          |
| 15          | -0.19991                                          | -9.22                                          |
| 20          | -0.20035                                          | -11.88                                         |
| 40          | -0.19176                                          | -20.90                                         |
| 60          | -0.19545                                          | -74.56                                         |
| 70          | -0.19946                                          | -104.98                                        |
| 80          | -0.21245                                          | -131.90                                        |
| 90          | -0.20036                                          | -162.92                                        |
| 100         | -0.20783                                          | -201.96                                        |

S3. Current response data for each PB-BDD at -0.2 V for linearity concentration in comparison with the blank (without H<sub>2</sub>O<sub>2</sub>)
